# Supplementary material for: High Prevalence of Antibodies against Canine Parvovirus and Canine Distemper Virus among Coyotes and Foxes from Pennsylvania: Implications for the Intersection of Companion Animals and Wildlife
Source: PubMed Central journal article supplement (PMC8791182; doi:10.1128/spectrum.02532-21), 2022-01-26
Supplement: spectrum02532-21_supp_1_seq5.pdf [file spectrum02532-21_supp_1_seq5.pdf]

Supplementary Table S1. Coyote and fox sample information and serological status

| Serum ID | Sex | PA<br>County | Collection Date | Stage of dev. | Species | CDV Ab | CPV Ab |
|----------|-----|--------------|-----------------|---------------|---------|--------|--------|
| CR-04    | F   | Clearfield   | 2/8/2015        | J             | Coyote  | +      | -      |
| CR-06    | M   | Tioga        | 2/8/2015        | A             | Coyote  | -      | -      |
| CR-07    | F   | Columbia     | 2/8/2015        | SA            | Coyote  | -      | -      |
| CR-09    | F   | Cambria      | 2/8/2015        | SA            | Coyote  | -      | +      |
| CR-10    | M   | Cambria      | 2/8/2015        | A             | Coyote  | +      | +      |
| CR-11    | M   | Jefferson    | 2/8/2015        | A             | Coyote  | +      | -      |
| CR-12    | M   | Somerset     | 2/8/2015        | A             | Coyote  | +      | +      |
| CR-13    | F   | Washington   | 2/8/2015        | A             | Coyote  | -      | +      |
| CR-14    | F   | Washington   | 2/8/2015        | SA            | Coyote  | -      | -      |
| CR-15    | F   | Schuylkill   | 2/8/2015        | A             | Coyote  | -      | -      |
| CR-16    | M   | Luzerne      | 2/8/2015        | SA            | Coyote  | -      | -      |
| CR-17    | M   | Luzerne      | 2/8/2015        | SA            | Coyote  | -      | -      |
| CR-18    | M   | Cambria      | 2/8/2015        | SA            | Coyote  | +      | +      |
| MC012    | M   | Clarion      | 2/22/2015       | J             | Coyote  | +      | +      |
| MC014    | M   | Clarion      | 2/22/2015       | SA            | Coyote  | +      | +      |
| MC015    | M   | Clearfield   | 2/22/2015       | A             | Coyote  | -      | +      |
| MC016    | M   | Clearfield   | 2/22/2015       | A             | Coyote  | +      | +      |
| MC017    | F   | Washington   | 2/22/2015       | J             | Coyote  | -      | -      |
| MC018    | M   | Erie         | 2/22/2015       | SA            | Coyote  | -      | +      |
| MC019    | M   | Erie         | 2/22/2015       | SA            | Coyote  | +      | -      |
| MC021    | M   | Cumberland   | 2/22/2015       | A             | Coyote  | +      | -      |
| MC100    | M   | Mercer       | 2/22/2015       | A             | Coyote  | +      | -      |
| MC113    | F   | Butler       | 2/22/2015       | SA            | Coyote  | +      | +      |
| MC114    | M   | Butler       | 2/22/2015       | A             | Coyote  | -      | -      |
| MC115    | F   | Tioga        | 2/22/2015       | A             | Coyote  | +      | -      |
| MC130    | NR  | NR           | 2/22/2015       | NR            | Coyote  | +      | -      |

|         |    |                |           |    |        |   |   |
|---------|----|----------------|-----------|----|--------|---|---|
| MC131   | NR | Erie           | 2/22/2015 | A  | Coyote | + | + |
| MC148   | F  | Clarion        | 2/22/2015 | J  | Coyote | - | - |
| MC2-001 | M  | Clinton        | 2/17/2017 | SA | Coyote | - | - |
| MC2-002 | M  | Clearfield     | 2/17/2017 | A  | Coyote | - | + |
| MC2-003 | F  | Susquehanna    | 2/17/2017 | A  | Coyote | - | - |
| MC2-004 | F  | Indiana        | 2/17/2017 | SA | Coyote | - | - |
| MC2-005 | M  | Susquehanna    | 2/17/2017 | A  | Coyote | - | + |
| MC2-006 | M  | Centre         | 2/17/2017 | J  | Coyote | - | - |
| MC2-008 | F  | Northumberland | 2/17/2017 | A  | Coyote | - | + |
| MC2-010 | F  | Crawford       | 2/17/2017 | A  | Coyote | - | - |
| MC2-011 | F  | Crawford       | 2/17/2017 | A  | Coyote | + | - |
| MC2-013 | M  | Crawford       | 2/17/2017 | J  | Coyote | + | - |
| MC2-016 | M  | Crawford       | 2/17/2017 | A  | Coyote | - | - |
| MC2-018 | F  | Elk            | 2/17/2017 | A  | Coyote | - | - |
| MC2-019 | M  | Clearfield     | 2/17/2017 | A  | Coyote | - | - |
| MC2-100 | F  | Monroe         | 2/19/2017 | A  | Coyote | - | + |
| MC2-101 | NR | NR             | 2/19/2017 | NR | Coyote | - | - |
| MC2-104 | NR | NR             | 2/19/2017 | NR | Coyote | - | + |
| MC2-111 | F  | Crawford       | 2/19/2017 | J  | Coyote | + | - |
| MC2-113 | M  | Crawford       | 2/19/2017 | A  | Coyote | - | - |
| MC2-119 | F  | Erie           | 2/19/2017 | A  | Coyote | - | + |
| MC2-121 | M  | Clinton        | 2/19/2017 | A  | Coyote | + | + |
| MC2-124 | M  | Luzerne        | 2/19/2017 | SA | Coyote | - | - |
| MC2-125 | F  | Luzerne        | 2/19/2017 | SA | Coyote | - | + |
| MC2-131 | F  | Susquehanna    | 2/19/2017 | SA | Coyote | - | - |
| MC2-134 | F  | Westmoreland   | 2/19/2017 | J  | Coyote | - | + |
| MC2-141 | M  | Potter         | 2/19/2017 | A  | Coyote | - | - |
| MC2-146 | M  | Crawford       | 2/19/2017 | A  | Coyote | - | - |
| MC2-147 | F  | Crawford       | 2/19/2017 | A  | Coyote | - | + |
| MC2-150 | F  | Cambria        | 2/19/2017 | A  | Coyote | - | - |
| MC2-155 | M  | Centre         | 2/19/2017 | A  | Coyote | - | - |

|         |    |                |           |    |        |   |   |
|---------|----|----------------|-----------|----|--------|---|---|
| MC2-157 | NR | NR             | 2/19/2017 | NR | Coyote | - | + |
| MC2-170 | F  | Erie           | 2/19/2017 | A  | Coyote | + | + |
| MC2-174 | NR | NR             | 2/19/2017 | NR | Coyote | - | - |
| MC2-179 | F  | Warren         | 2/19/2017 | A  | Coyote | - | - |
| MC2-020 | F  | Clearfield     | 2/17/2017 | J  | Coyote | - | + |
| MC2-021 | M  | Crawford       | 2/18/2017 | SA | Coyote | - | + |
| MC2-023 | F  | Centre         | 2/18/2017 | A  | Coyote | - | + |
| MC2-024 | F  | Tioga          | 2/18/2017 | SA | Coyote | - | + |
| MC2-025 | M  | Warren         | 2/18/2017 | A  | Coyote | - | + |
| MC2-026 | M  | Warren         | 2/18/2017 | A  | Coyote | - | + |
| MC2-028 | F  | Clarion        | 2/18/2017 | J  | Coyote | - | - |
| MC2-029 | F  | Venango        | 2/18/2017 | SA | Coyote | - | - |
| MC2-033 | M  | Centre         | 2/18/2017 | J  | Coyote | - | - |
| MC2-034 | M  | Centre         | 2/18/2017 | SA | Coyote | + | - |
| MC2-035 | M  | Clearfield     | 2/18/2017 | SA | Coyote | + | - |
| MC2-036 | F  | Bedford        | 2/19/2017 | SA | Coyote | - | + |
| MC2-037 | M  | Bedford        | 2/19/2017 | J  | Coyote | - | - |
| MC2-039 | M  | Huntingdon     | 2/19/2017 | SA | Coyote | - | + |
| MC2-041 | M  | Warren         | 2/19/2017 | SA | Coyote | - | + |
| MC2-044 | F  | Monroe         | 2/19/2017 | SA | Coyote | - | - |
| MC2-047 | M  | Elk            | 2/19/2017 | SA | Coyote | - | - |
| MC2-048 | NR | NR             | 2/19/2017 | NR | Coyote | - | - |
| MC2-051 | NR | NR             | 2/19/2017 | NR | Coyote | - | - |
| MC2-052 | M  | Clarion        | 2/19/2017 | A  | Coyote | - | + |
| MC2-62  | F  | Somerset       | 2/19/2017 | A  | Coyote | - | - |
| MC2-65  | M  | Clearfield     | 2/19/2017 | A  | Coyote | - | + |
| MC2-68  | M  | Northumberland | 2/19/2017 | A  | Coyote | - | - |
| MC2-70  | F  | Northumberland | 2/19/2017 | SA | Coyote | - | - |
| MC2-73  | M  | Pike           | 2/19/2017 | SA | Coyote | - | + |
| MC2-76  | F  | Centre         | 2/19/2017 | A  | Coyote | - | + |
| MC2-79  | F  | Crawford       | 2/19/2017 | J  | Coyote | - | - |

|        |    |                |           |    |        |   |   |
|--------|----|----------------|-----------|----|--------|---|---|
| MC2-80 | M  | Armstrong      | 2/19/2017 | J  | Coyote | - | + |
| MC2-82 | F  | Allegheny      | 2/19/2017 | A  | Coyote | + | - |
| MC2-83 | F  | Clarion        | 2/19/2017 | J  | Coyote | + | - |
| MC2-89 | M  | Sullivan       | 2/19/2017 | A  | Coyote | - | + |
| MC2-92 | F  | Montour        | 2/19/2017 | SA | Coyote | + | + |
| MC2-95 | M  | Bradford       | 2/19/2017 | SA | Coyote | + | - |
| MC22   | M  | Cumberland     | 2/22/2015 | SA | Coyote | - | - |
| MC26   | M  | Clearfield     | 2/22/2015 | A  | Coyote | + | + |
| MC28   | F  | Clearfield     | 2/22/2015 | J  | Coyote | + | + |
| MC30   | M  | Potter         | 2/22/2015 | A  | Coyote | + | + |
| MC32   | F  | Fayette        | 2/22/2015 | J  | Coyote | - | - |
| MC35   | M  | Beaver         | 2/22/2015 | J  | Coyote | - | - |
| MC40-1 | M  | Erie           | 2/22/2015 | A  | Coyote | + | - |
| MC40-2 | M  | Centre         | 2/22/2015 | SA | Coyote | + | - |
| MC48   | M  | Tioga          | 2/22/2015 | SA | Coyote | + | + |
| MC49   | M  | McKean         | 2/22/2015 | A  | Coyote | + | - |
| MC53   | F  | Clinton        | 2/22/2015 | J  | Coyote | - | + |
| MC56   | M  | Washington     | 2/22/2015 | A  | Coyote | + | + |
| MC57   | F  | Allegheny      | 2/22/2015 | SA | Coyote | - | - |
| MC86   | F  | Northumberland | 2/22/2015 | A  | Coyote | - | + |
| MC87   | F  | Pike           | 2/22/2015 | A  | Coyote | - | + |
| MC90   | M  | Wyoming        | 2/22/2015 | A  | Coyote | - | - |
| MC97   | F  | Mercer         | 2/22/2015 | A  | Coyote | - | + |
| MC99   | F  | Mercer         | 2/22/2015 | J  | Coyote | + | - |
| SP0    | NR | NR             | NR        | NR | Coyote | - | - |
| SP02   | M  | Wyoming        | 1/23/2015 | SA | Coyote | - | + |
| SP03   | M  | Luzerne        | 1/23/2015 | A  | Coyote | - | + |
| SP10   | F  | Susquehanna    | 1/24/2015 | A  | Coyote | - | - |
| SP11   | M  | Wayne          | 1/24/2015 | A  | Coyote | - | - |
| SP12   | F  | Wayne          | 1/24/2015 | A  | Coyote | - | - |
| SP14   | F  | Wayne          | 1/24/2015 | A  | Coyote | - | - |

|      |   |             |           |    |        |   |   |
|------|---|-------------|-----------|----|--------|---|---|
| SP15 | F | Wayne       | 1/24/2015 | A  | Coyote | - | + |
| SP17 | M | Susquehanna | 1/24/2015 | SA | Coyote | - | + |
| SP18 | M | Bradford    | 1/24/2015 | A  | Coyote | - | + |
| SP19 | F | Bradford    | 1/24/2015 | A  | Coyote | - | - |
| SP20 | M | Wyoming     | 1/25/2015 | A  | Coyote | - | + |
| SP21 | M | Luzerne     | 1/25/2015 | A  | Coyote | - | + |
| SP24 | F | Susquehanna | 1/25/2015 | A  | Coyote | - | - |
| SP25 | M | Susquehanna | 1/25/2015 | A  | Coyote | - | + |
| SP26 | F | Wyoming     | 1/25/2015 | SA | Coyote | - | - |
| T1   | F | Pike        | 1/24/2020 | J  | Coyote | + | + |
| T2   | M | Pike        | 1/24/2020 | SA | Coyote | + | - |
| T3   | F | Susquehanna | 1/24/2020 | J  | Coyote | - | - |
| T4   | M | Wyoming     | 1/24/2020 | A  | Coyote | - | + |
| T6   | M | Luzerne     | 1/24/2020 | A  | Coyote | - | - |
| T7   | F | Luzerne     | 1/24/2020 | A  | Coyote | - | + |
| T8   | F | Susquehanna | 1/24/2020 | A  | Coyote | - | + |
| T9   | F | Wyoming     | 1/24/2020 | A  | Coyote | - | + |
| T11  | M | Wayne       | 1/24/2020 | J  | Coyote | - | - |
| T12  | F | Wayne       | 1/24/2020 | J  | Coyote | - | - |
| T15  | M | Bradford    | 1/24/2020 | A  | Coyote | + | - |
| T17  | M | Bradford    | 1/24/2020 | J  | Coyote | - | + |
| T20  | M | Bradford    | 1/24/2020 | A  | Coyote | - | + |
| T21  | F | Luzerne     | 1/24/2020 | A  | Coyote | + | - |
| T23  | F | Luzerne     | 1/24/2020 | A  | Coyote | - | + |
| T24  | M | Lackawanna  | 1/24/2020 | SA | Coyote | - | + |
| T26  | M | Wayne       | 1/24/2020 | SA | Coyote | + | + |
| T27  | M | Wayne       | 1/24/2020 | SA | Coyote | - | + |
| T28  | F | Susquehanna | 1/25/2020 | SA | Coyote | - | - |
| T30  | F | Susquehanna | 1/25/2020 | J  | Coyote | - | + |
| T31  | M | Wyoming     | 1/25/2020 | SA | Coyote | - | + |
| T32  | M | Lackawanna  | 1/25/2020 | J  | Coyote | + | + |

|     |   |             |           |    |        |   |   |
|-----|---|-------------|-----------|----|--------|---|---|
| T33 | M | Wayne       | 1/25/2020 | SA | Coyote | - | + |
| T34 | F | Wayne       | 1/25/2020 | J  | Coyote | - | + |
| T35 | M | Lackawanna  | 1/26/2020 | J  | Coyote | - | + |
| T39 | M | Wayne       | 1/26/2020 | A  | Coyote | + | - |
| T40 | F | Luzerne     | 1/26/2020 | J  | Coyote | - | - |
| T41 | F | Wyoming     | 1/26/2020 | A  | Coyote | - | - |
| T42 | F | Wyoming     | 1/26/2020 | SA | Coyote | - | + |
| T44 | M | Wayne       | 1/26/2020 | SA | Coyote | - | + |
| T46 | F | Lackawanna  | 1/25/2020 | J  | Coyote | - | + |
| S1  | F | Susquehanna | 1/17/2020 | A  | Coyote | - | + |
| S2  | M | Susquehanna | 1/17/2020 | SA | Coyote | - | + |
| S3  | M | Susquehanna | 1/17/2020 | SA | Coyote | - | - |
| S4  | M | Susquehanna | 1/17/2020 | A  | Coyote | - | + |
| S5  | F | Luzerne     | 1/17/2020 | A  | Coyote | - | + |
| S6  | M | Wayne       | 1/17/2020 | J  | Coyote | - | - |
| S7  | F | Wayne       | 1/17/2020 | J  | Coyote | + | - |
| S8  | M | Wayne       | 1/17/2020 | J  | Coyote | + | - |
| S9  | F | Lackawanna  | 1/17/2020 | J  | Coyote | - | - |
| S13 | F | Susquehanna | 1/18/2020 | J  | Coyote | - | - |
| S17 | M | Susquehanna | 1/18/2020 | A  | Coyote | - | - |
| S18 | F | Wayne       | 1/18/2020 | J  | Coyote | + | + |
| S19 | M | Susquehanna | 1/18/2020 | SA | Coyote | - | + |
| S21 | F | Bradford    | 1/18/2020 | A  | Coyote | + | + |
| S22 | M | Bradford    | 1/18/2020 | SA | Coyote | - | + |
| S24 | M | Susquehanna | 1/19/2020 | A  | Coyote | - | + |
| S25 | F | Susquehanna | 1/19/2020 | J  | Coyote | - | - |
| S26 | M | Susquehanna | 1/19/2020 | A  | Coyote | - | - |
| S27 | M | Wyoming     | 1/19/2020 | A  | Coyote | - | + |
| S28 | F | Wyoming     | 1/19/2020 | A  | Coyote | - | - |
| S29 | M | Wyoming     | 1/19/2020 | J  | Coyote | - | - |
| S30 | M | Wayne       | 1/19/2020 | SA | Coyote | - | + |

|     |   |            |           |     |        |   |   |
|-----|---|------------|-----------|-----|--------|---|---|
| S32 | M | Wayne      | 1/19/2020 | A   | Coyote | - | - |
| S34 | M | Wayne      | 1/19/2020 | SA  | Coyote | - | - |
| S35 | M | Wayne      | 1/19/2020 | A   | Coyote | + | + |
| C3  | M | Armstrong  | 2/7/2020  | SA  | Coyote | + | - |
| C4  | M | Cambria    | 2/7/2020  | J   | Coyote | - | - |
| C7  | M | Armstrong  | 2/7/2020  | SA  | Coyote | - | - |
| C8  | F | Armstrong  | 2/7/2020  | SA  | Coyote | - | + |
| C17 | F | Bedford    | 2/8/2020  | A   | Coyote | - | + |
| C18 | F | Indiana    | 2/8/2020  | SA  | Coyote | - | - |
| C19 | M | Cambria    | 2/8/2020  | A   | Coyote | - | - |
| C20 | M | Indiana    | 2/8/2020  | SA  | Coyote | - | - |
| C21 | F | Bedford    | 2/8/2020  | A   | Coyote | - | - |
| C22 | F | Clearfield | 2/8/2020  | A   | Coyote | - | + |
| C23 | F | Clearfield | 2/8/2020  | A   | Coyote | - | - |
| C24 | F | Clearfield | 2/8/2020  | A   | Coyote | - | + |
| C25 | M | Clearfield | 2/8/2020  | A   | Coyote | - | + |
| C26 | F | Venango    | 2/8/2020  | SA  | Coyote | - | + |
| C27 | F | Venango    | 2/8/2020  | SA  | Coyote | - | - |
| C28 | F | Clearfield | 2/8/2020  | A   | Coyote | - | + |
| C29 | M | Somerset   | 2/9/2020  | SA  | Coyote | + | - |
| C31 | M | Somerset   | 2/9/2020  | J   | Coyote | + | + |
| C33 | M | Cambria    | 2/9/2020  | N/A | Coyote | + | - |
| C42 | F | Cambria    | 2/9/2020  | A   | Coyote | - | - |
| C47 | M | Somerset   | 2/9/2020  | A   | Coyote | - | + |
| C50 | M | Clearfield | 2/9/2020  | A   | Coyote | - | - |
| C52 | M | Indiana    | 2/8/2020  | J   | Coyote | - | + |
| C58 | F | Cambria    | 2/8/2020  | SA  | Coyote | + | - |
| C61 | F | Butler     | 2/9/2020  | A   | Coyote | - | - |
| C66 | M | Tioga      | 2/9/2020  | A   | Coyote | + | + |
| C67 | M | Cambria    | 2/9/2020  | A   | Coyote | - | - |
| C70 | M | Erie       | 2/8/2020  | A   | Coyote | - | - |

|     |   |              |           |    |        |   |   |
|-----|---|--------------|-----------|----|--------|---|---|
| C71 | M | Erie         | 2/8/2020  | A  | Coyote | - | - |
| C72 | M | Allegheny    | 2/8/2020  | J  | Coyote | - | - |
| C74 | F | Erie         | 2/8/2020  | J  | Coyote | - | - |
| C75 | M | Allegheny    | 2/8/2020  | SA | Coyote | - | + |
| C76 | M | Allegheny    | 2/8/2020  | SA | Coyote | - | - |
| C77 | F | Warren       | 2/8/2020  | J  | Coyote | - | - |
| C78 | F | Bradford     | 2/8/2020  | J  | Coyote | - | + |
| C80 | F | Bradford     | 2/8/2020  | A  | Coyote | - | + |
| M1  | M | Tioga        | 2/21/2020 | SA | Coyote | - | + |
| M2  | M | Clinton      | 2/21/2020 | A  | Coyote | - | + |
| M3  | M | Erie         | 2/21/2020 | A  | Coyote | - | - |
| M4  | M | Centre       | 2/21/2020 | SA | Coyote | - | + |
| M5  | M | Clearfield   | 2/21/2020 | J  | Coyote | - | - |
| M6  | M | Clearfield   | 2/21/2020 | J  | Coyote | - | + |
| M13 | F | Cameron      | 2/22/2020 | J  | Coyote | + | + |
| M14 | M | Centre       | 2/22/2020 | SA | Coyote | + | + |
| M15 | M | Centre       | 2/22/2020 | J  | Coyote | - | + |
| M16 | M | Clearfield   | 2/21/2020 | J  | Coyote | - | - |
| M17 | F | Clearfield   | 2/21/2020 | J  | Coyote | + | - |
| M22 | M | Elk          | 2/22/2020 | SA | Coyote | + | - |
| M23 | M | Warren       | 2/21/2020 | SA | Coyote | - | + |
| M25 | F | Clarion      | 2/22/2020 | SA | Coyote | - | - |
| M26 | F | Centre       | 2/22/2020 | J  | Coyote | + | - |
| M27 | M | Centre       | 2/22/2020 | SA | Coyote | + | - |
| M29 | M | Cambria      | 2/22/2020 | SA | Coyote | - | + |
| M30 | M | Clarion      | 2/22/2020 | SA | Coyote | - | - |
| M31 | M | Clarion      | 2/22/2020 | SA | Coyote | + | - |
| M35 | M | Beaver       | 2/21/2020 | J  | Coyote | - | - |
| M39 | M | Fayette      | 2/22/2020 | J  | Coyote | - | + |
| M40 | F | Westmoreland | 2/22/2020 | J  | Coyote | - | + |
| M42 | M | Centre       | 2/21/2020 | SA | Coyote | - | + |



|      |   |             |           |    |          |   |   |
|------|---|-------------|-----------|----|----------|---|---|
| M44  | F | Tioga       | 2/23/2020 | J  | Coyote   | - | - |
| M46  | M | Potter      | 2/22/2020 | SA | Coyote   | - | - |
| M50  | F | Clarion     | 2/22/2020 | J  | Coyote   | + | - |
| M51  | F | Clarion     | 2/22/2020 | SA | Coyote   | - | + |
| M52  | F | Lawrence    | 2/22/2020 | SA | Coyote   | - | - |
| M54  | M | Clearfield  | 2/22/2020 | A  | Coyote   | + | - |
| M55  | M | Cumberland  | 2/22/2020 | A  | Coyote   | - | - |
| M59  | M | Jefferson   | 2/22/2020 | A  | Coyote   | + | + |
| M66  | F | Armstrong   | 2/22/2020 | J  | Coyote   | - | - |
| M68  | M | Lawrence    | 2/22/2020 | SA | Coyote   | + | - |
| M69  | F | Lawrence    | 2/22/2020 | SA | Coyote   | - | - |
| M71  | M | Elk         | 2/23/2020 | A  | Coyote   | - | + |
| M74  | M | Centre      | 2/21/2020 | SA | Coyote   | - | - |
| M77  | F | Centre      | 2/22/2020 | J  | Coyote   | - | - |
| M78  | M | Centre      | 2/22/2020 | SA | Coyote   | - | + |
| M79  | M | Lycoming    | 2/22/2020 | A  | Coyote   | - | + |
| M81  | M | Juniata     | 2/22/2020 | SA | Coyote   | + | - |
| M85  | F | McKean      | 2/22/2020 | SA | Coyote   | - | + |
| M90  | M | Allegheny   | 2/22/2020 | SA | Coyote   | + | + |
| M91  | F | Elk         | 2/22/2020 | SA | Coyote   | - | - |
| M95  | M | Greene      | 2/22/2020 | A  | Coyote   | + | - |
| M96  | M | Greene      | 2/22/2020 | A  | Coyote   | - | - |
| M100 | M | Clearfield  | 2/22/2020 | J  | Coyote   | - | - |
| M103 | M | Susquehanna | 2/22/2020 | SA | Coyote   | - | - |
| M106 | F | Lycoming    | 2/22/2020 | SA | Coyote   | + | - |
| S10  | F | Wyoming     | 1/18/2020 | A  | Red Fox  | - | - |
| S11  | M | Luzerne     | 1/18/2020 | A  | Gray Fox | - | - |
| S14  | M | Wyoming     | 1/18/2020 | A  | Gray Fox | - | + |
| S15  | F | Lackawanna  | 1/18/2020 | A  | Red Fox  | - | - |
| S16  | M | Wyoming     | 1/18/2020 | SA | Red Fox  | - | + |
| A1   | F | Adams       | 1/16/2020 | A  | Red Fox  | + | - |

|     |   |          |           |    |          |   |   |
|-----|---|----------|-----------|----|----------|---|---|
| A3  | M | Adams    | 1/16/2020 | SA | Red Fox  | - | - |
| A4  | M | Adams    | 1/16/2020 | A  | Red Fox  | - | + |
| A5  | M | Adams    | 1/16/2020 | A  | Red Fox  | - | + |
| A7  | F | Adams    | 1/16/2020 | J  | Red Fox  | - | - |
| A8  | M | Adams    | 1/16/2020 | A  | Red Fox  | - | + |
| A12 | M | Adams    | 1/16/2020 | A  | Red Fox  | - | - |
| A13 | M | Adams    | 1/16/2020 | A  | Red Fox  | - | - |
| A14 | F | Adams    | 1/16/2020 | J  | Red Fox  | - | + |
| A17 | F | Adams    | 1/16/2020 | J  | Red Fox  | - | - |
| A19 | F | Adams    | 1/16/2020 | J  | Red Fox  | - | + |
| A20 | M | Adams    | 1/16/2020 | A  | Red Fox  | - | - |
| A21 | M | Adams    | 1/16/2020 | SA | Red Fox  | - | - |
| A23 | M | Adams    | 1/16/2020 | A  | Red Fox  | + | - |
| A24 | F | Adams    | 1/16/2020 | J  | Red Fox  | - | - |
| A25 | M | Adams    | 1/16/2020 | A  | Red Fox  | - | + |
| A27 | F | Adams    | 1/16/2020 | J  | Red Fox  | - | - |
| A30 | M | Adams    | 1/16/2020 | J  | Red Fox  | - | + |
| A31 | M | Adams    | 1/16/2020 | A  | Red Fox  | + | - |
| A36 | F | Adams    | 1/16/2020 | A  | Gray Fox | - | + |
| A37 | M | Adams    | 1/16/2020 | SA | Red Fox  | + | - |
| A40 | M | Adams    | 1/17/2020 | SA | Red Fox  | - | + |
| A45 | F | Adams    | 1/17/2020 | SA | Red Fox  | + | + |
| A46 | M | Adams    | 1/17/2020 | SA | Red Fox  | - | + |
| A48 | F | Adams    | 1/17/2020 | A  | Red Fox  | - | - |
| A50 | F | Adams    | 1/17/2020 | A  | Red Fox  | - | + |
| A52 | F | Adams    | 1/17/2020 | A  | Gray Fox | - | + |
| C2  | F | Somerset | 2/7/2020  | A  | Gray Fox | - | - |
| C5  | M | Blair    | 2/7/2020  | A  | Gray Fox | - | + |
| C6  | F | Blair    | 2/7/2020  | SA | Red Fox  | - | + |
| C9  | M | Butler   | 2/7/2020  | A  | Gray Fox | - | + |
| C12 | F | Blair    | 2/8/2020  | A  | Gray Fox | - | - |

|          |    |              |          |    |          |   |   |
|----------|----|--------------|----------|----|----------|---|---|
| C13      | M  | Blair        | 2/8/2020 | A  | Gray Fox | - | + |
| C15      | F  | Blair        | 2/8/2020 | A  | Gray Fox | - | + |
| C16      | M  | Centre       | 2/8/2020 | A  | Gray Fox | - | - |
| C30      | M  | Cambria      | 2/8/2020 | J  | Red Fox  | - | - |
| C32      | M  | Westmoreland | 2/9/2020 | SA | Red Fox  | + | - |
| C35      | M  | Clinton      | 2/9/2020 | A  | Gray Fox | - | + |
| C36      | M  | York         | 2/9/2020 | A  | Red Fox  | - | - |
| C37      | M  | York         | 2/9/2020 | A  | Red Fox  | + | + |
| C38      | M  | York         | 2/9/2020 | SA | Red Fox  | + | - |
| C39      | F  | York         | 2/9/2020 | SA | Red Fox  | + | + |
| C40      | F  | York         | 2/9/2020 | A  | Red Fox  | - | - |
| C43      | M  | Cambria      | 2/9/2020 | A  | Gray Fox | - | - |
| C44      | F  | Huntingdon   | 2/9/2020 | A  | Red Fox  | + | + |
| C45      | M  | Huntingdon   | 2/9/2020 | SA | Red Fox  | + | - |
| C46      | F  | Huntingdon   | 2/9/2020 | J  | Red Fox  | - | + |
| C48      | M  | Indiana      | 2/9/2020 | A  | Gray Fox | - | + |
| C53      | M  | York         | 2/9/2020 | SA | Red Fox  | - | - |
| C56      | M  | York         | 2/9/2020 | J  | Red Fox  | + | - |
| C59      | F  | Lancaster    | 2/9/2020 | A  | Red Fox  | - | - |
| C60      | M  | York         | 2/9/2020 | A  | Red Fox  | - | - |
| C63      | F  | Lancaster    | 2/9/2020 | A  | Red Fox  | - | + |
| C64      | M  | Lancaster    | 2/9/2020 | A  | Red Fox  | - | - |
| GF.CR.6  | M  | Clinton      | 2/9/2020 | NR | Gray Fox | + | + |
| RF.CR.11 | M  | York         | 2/9/2020 | NR | Red fox  | - | + |
| RF.CR.12 | F  | York         | 2/9/2020 | NR | Red Fox  | - | + |
| RF.CR.13 | F  | York         | 2/9/2020 | NR | Red Fox  | + | + |
| RF.CR.14 | M  | York         | 2/9/2020 | NR | Red Fox  | + | - |
| GF.CR.25 | NR | Cambria      | 2/9/2020 | NR | Gray Fox | + | + |
| RF.CR.26 | NR | Lancaster    | 2/9/2020 | NR | Red Fox  | + | + |
| RF.CR.34 | M  | York         | 2/9/2020 | NR | Red Fox  | + | + |
| RF.CR.35 | M  | Westmoreland | 2/9/2020 | NR | Red Fox  | - | + |

|             |    |                |           |    |         |   |   |
|-------------|----|----------------|-----------|----|---------|---|---|
| RF.CR.37    | F  | Cambria        | 2/9/2020  | NR | Red Fox | + | - |
| RF.CR.39    | M  | York           | 2/9/2020  | NR | Red Fox | - | + |
| RF.CR.41    | M  | York           | 2/9/2020  | NR | Red Fox | + | - |
| RF.CR.42    | M  | Lancaster      | 2/9/2020  | NR | Red Fox | + | + |
| RF.CR.43    | M  | Lancaster      | 2/9/2020  | NR | Red Fox | + | + |
| RF.CR.44    | F  | Lancaster      | 2/9/2020  | NR | Red Fox | + | + |
| RF.11.6.19  | NR | Northumberland | 11/6/2019 | NR | Red Fox | - | + |
| RF.12.7.19  | NR | Union          | 12/8/2019 | NR | Red Fox | - | + |
| RF.1.5.20   | NR | Lycoming       | 1/7/2020  | NR | Red Fox | - | + |
| RF.1.6.20.A | NR | Juniata        | 1/7/2020  | NR | Red Fox | + | + |
| RF.2.4.20   | M  | Bucks          | 2/4/2020  | NR | Red Fox | + | + |

---

Pennsylvania (PA); Male (M); Female (F); Not Reported (NR); Adult (A); Subadult (SA); Juvenile (J); Canine Distemper Virus (CDV); Canine Parvovirus (CPV); Antibody (Ab); Identifier (ID)

Supplementary Figure S1. Images of TiterCHEK CDV-CPV results

| Coyote Serum ID | CDV |   | CPV |   | Coyote Serum ID | CDV |   | CPV |   |
|-----------------|-----|---|-----|---|-----------------|-----|---|-----|---|
| +               |     | + |     | + | MC2-18          |     | - |     | - |
| -               |     | - |     | - | MC2-19          |     | - |     | - |
| T1              |     | + |     | + | T23             |     | - |     | + |
| T2              |     | + |     | - | T24             |     | - |     | + |
| T3              |     | - |     | - | T26             |     | + |     | + |
| T4              |     | - |     | + | T27             |     | - |     | - |
| T6              |     | - |     | - | T28             |     | - |     | + |
| T7              |     | - |     | + | T30             |     | - |     | + |
| T8              |     | - |     | + | T31             |     | - |     | + |
| T9              |     | - |     | + | T32             |     | + |     | + |
| T11             |     | - |     | - | T33             |     | - |     | + |
| T12             |     | - |     | - | T34             |     | - |     | + |
| T15             |     | + |     | - | T35             |     | - |     | + |
| T17             |     | - |     | + | T39             |     | + |     | - |
| T20             |     | - |     | + | T40             |     | - |     | - |
| T21             |     | + |     | - | T41             |     | - |     | - |

|     |                                                                                     |   |                                                                                     |   |     |                                                                                       |   |                                                                                       |   |
|-----|-------------------------------------------------------------------------------------|---|-------------------------------------------------------------------------------------|---|-----|---------------------------------------------------------------------------------------|---|---------------------------------------------------------------------------------------|---|
| T42 |    | - |    | + | S18 |    | + |    | + |
| T44 |    | - |    | + | S19 |    | - |    | + |
| T46 |    | - |    | + | S21 |    | + |    | + |
| S1  |    | - |    | + | S22 |    | - |    | + |
| S2  |    | - |    | + | S24 |    | - |    | + |
| S3  |    | - |    | - | S25 |    | - |    | - |
| S4  |    | - |    | + | S26 |    | - |    | - |
| S5  |   | - |   | + | S27 |   | - |   | + |
| S6  |  | - |  | - | S28 |  | - |  | - |
| S7  |  | + |  | - | S29 |  | - |  | - |
| S8  |  | + |  | - | S30 |  | - |  | + |
| S9  |  | - |  | - | S32 |  | - |  | - |
| S13 |  | - |  | - | S34 |  | - |  | - |
| S17 |  | - |  | - | S35 |  | + |  | + |

|     |                                                                                     |   |                                                                                     |   |     |                                                                                       |   |                                                                                       |   |
|-----|-------------------------------------------------------------------------------------|---|-------------------------------------------------------------------------------------|---|-----|---------------------------------------------------------------------------------------|---|---------------------------------------------------------------------------------------|---|
| C3  |    | + |    | - | C27 |    | - |    | - |
| C4  |    | - |    | - | C28 |    | - |    | + |
| C7  |    | - |    | - | C29 |    | + |    | - |
| C8  |    | - |    | + | C31 |    | + |    | + |
| C17 |    | - |    | + | C33 |    | + |    | - |
| C18 |    | - |    | - | C42 |    | - |    | - |
| C19 |    | - |    | - | C47 |    | - |    | + |
| C20 |   | - |   | - | C50 |   | - |   | - |
| C21 |  | - |  | - | C52 |  | - |  | + |
| C22 |  | - |  | + | C58 |  | + |  | - |
| C23 |  | - |  | - | C61 |  | - |  | - |
| C24 |  | - |  | + | C66 |  | + |  | + |
| C25 |  | - |  | + | C67 |  | - |  | - |
| C26 |  | - |  | + | C70 |  | - |  | - |



|     |                                                                                     |   |                                                                                     |   |     |                                                                                       |   |                                                                                       |   |
|-----|-------------------------------------------------------------------------------------|---|-------------------------------------------------------------------------------------|---|-----|---------------------------------------------------------------------------------------|---|---------------------------------------------------------------------------------------|---|
| C71 |    | - |    | - | M13 |    | + |    | + |
| C72 |    | - |    | - | M14 |    | + |    | + |
| C74 |    | - |    | - | M15 |    | - |    | + |
| C75 |    | - |    | + | M16 |    | - |    | - |
| C76 |    | - |    | - | M17 |    | + |    | - |
| C77 |    | - |    | - | M22 |    | + |    | - |
| C78 |    | - |    | + | M23 |    | - |    | + |
| C80 |   | - |   | + | M25 |   | - |   | - |
| M1  |  | - |  | + | M26 |  | + |  | - |
| M2  |  | - |  | + | M27 |  | + |  | - |
| M3  |  | - |  | - | M29 |  | - |  | + |
| M4  |  | - |  | + | M30 |  | - |  | - |
| M5  |  | - |  | - | M31 |  | + |  | - |
| M6  |  | - |  | + | M35 |  | - |  | - |



|     |                                                                                     |   |                                                                                     |   |      |                                                                                       |   |                                                                                       |   |
|-----|-------------------------------------------------------------------------------------|---|-------------------------------------------------------------------------------------|---|------|---------------------------------------------------------------------------------------|---|---------------------------------------------------------------------------------------|---|
| M39 |    | - |    | + | M71  |    | - |    | + |
| M40 |    | - |    | + | M74  |    | - |    | - |
| M42 |    | - |    | + | M77  |    | - |    | - |
| M44 |    | - |    | - | M78  |    | - |    | + |
| M46 |    | - |    | - | M79  |    | - |    | + |
| M50 |    | + |    | - | M81  |    | + |    | - |
| M51 |   | - |   | + | M85  |   | - |   | + |
| M52 |  | - |  | - | M90  |  | + |  | + |
| M54 |  | + |  | - | M91  |  | - |  | - |
| M55 |  | - |  | - | M95  |  | + |  | - |
| M59 |  | + |  | + | M96  |  | - |  | - |
| M66 |  | - |  | - | M100 |  | - |  | - |
| M68 |  | + |  | - | M103 |  | - |  | - |
| M69 |  | - |  | - | M106 |  | + |  | - |

|         |  |   |  |   |        |  |   |  |   |
|---------|--|---|--|---|--------|--|---|--|---|
| MC2-121 |  | + |  | + | MC2-20 |  | - |  | + |
| MC2-174 |  | - |  | - | MC2-21 |  | - |  | + |
| MC2-179 |  | - |  | - | MC2-23 |  | - |  | + |
| SP0     |  | - |  | - | MC2-24 |  | - |  | + |
| SP2     |  | - |  | + | MC2-25 |  | - |  | + |
| SP3     |  | - |  | + | MC2-26 |  | - |  | + |
| SP10    |  | - |  | - | MC2-28 |  | - |  | - |
| SP11    |  | - |  | - | MC2-29 |  | - |  | - |
| SP12    |  | - |  | - | MC2-33 |  | - |  | - |
| SP14    |  | - |  | - | CR-7   |  | - |  | - |
| SP15    |  | - |  | + | CR-4   |  | + |  | - |
| SP17    |  | - |  | + | CR-6   |  | - |  | - |
| SP18    |  | - |  | + | CR-9   |  | - |  | + |
| SP20    |  | - |  | + | CR-10  |  | + |  | + |
| SP21    |  | - |  | + | CR-11  |  | + |  | - |
| SP24    |  | - |  | - | CR-12  |  | + |  | + |
| SP25    |  | - |  | + | CR-13  |  | - |  | + |
| SP26    |  | - |  | - | CR-14  |  | - |  | - |

|        |                                                                                     |   |                                                                                     |   |        |                                                                                       |   |                                                                                       |   |
|--------|-------------------------------------------------------------------------------------|---|-------------------------------------------------------------------------------------|---|--------|---------------------------------------------------------------------------------------|---|---------------------------------------------------------------------------------------|---|
| SP19   |    | - |    | - | CR-15  |    | - |    | - |
| MC12   |    | + |    | + | CR-16  |    | - |    | - |
| MC14   |    | + |    | + | CR-17  |    | - |    | - |
| MC15   |    | - |    | + | CR-18  |    | + |    | + |
| MC16   |    | + |    | + | MC2-34 |    | + |    | - |
| MC17   |    | - |    | - | MC2-35 |    | + |    | - |
| MC18   |    | - |    | + | MC2-36 |    | - |    | + |
| MC19   |    | + |    | - | MC2-37 |    | - |    | - |
| MC21   |   | + |   | - | MC2-39 |   | - |   | + |
| MC22   |  | - |  | - | MC2-41 |  | - |  | + |
| MC26   |  | + |  | + | MC2-44 |  | - |  | - |
| MC28   |  | + |  | + | MC2-47 |  | - |  | - |
| MC30   |  | + |  | + | MC2-48 |  | - |  | - |
| MC32   |  | - |  | - | MC2-51 |  | - |  | - |
| MC35   |  | - |  | - | MC2-52 |  | - |  | + |
| MC40-1 |  | + |  | - | MC2-62 |  | - |  | - |
| MC40-2 |  | + |  | - | MC2-65 |  | - |  | + |
| MC48   |  | + |  | + | MC2-68 |  | - |  | - |



|       |  |   |  |   |         |  |   |  |   |
|-------|--|---|--|---|---------|--|---|--|---|
| MC49  |  | + |  | - | MC2-70  |  | - |  | - |
| MC53  |  | - |  | + | MC2-73  |  | - |  | + |
| MC56  |  | + |  | + | MC2-76  |  | - |  | + |
| MC57  |  | - |  | - | MC2-79  |  | - |  | - |
| MC86  |  | - |  | + | MC2-80  |  | - |  | + |
| MC87  |  | - |  | + | MC2-82  |  | + |  | - |
| MC90  |  | - |  | - | MC2-83  |  | + |  | - |
| MC97  |  | - |  | + | MC2-89  |  | - |  | + |
| MC99  |  | + |  | - | MC2-92  |  | + |  | + |
| MC100 |  | + |  | - | MC2-95  |  | + |  | - |
| MC113 |  | + |  | + | MC2-100 |  | - |  | + |
| MC114 |  | - |  | - | MC2-101 |  | - |  | - |
| MC115 |  | + |  | - | MC2-104 |  | - |  | + |
| MC130 |  | + |  | - | MC2-111 |  | + |  | - |
| MC131 |  | + |  | + | MC2-113 |  | - |  | - |
| MC148 |  | - |  | - | MC2-119 |  | - |  | + |
| MC2-1 |  | - |  | - | MC2-124 |  | - |  | - |
| MC2-2 |  | - |  | + | MC2-125 |  | - |  | + |

|        |                                                                                    |   |                                                                                    |   |
|--------|------------------------------------------------------------------------------------|---|------------------------------------------------------------------------------------|---|
| MC2-3  |   | - |   | - |
| MC2-4  |   | - |   | - |
| MC2-5  |   | - |   | + |
| MC2-6  |   | - |   | - |
| MC2-8  |   | - |   | + |
| MC2-10 |   | - |   | - |
| MC2-11 |   | + |   | - |
| MC2-13 |   | + |   | - |
| MC2-16 |  | - |  | - |

---

|         |                                                                                      |   |                                                                                      |   |
|---------|--------------------------------------------------------------------------------------|---|--------------------------------------------------------------------------------------|---|
| MC2-131 |   | - |   | - |
| MC2-134 |   | - |   | + |
| MC2-141 |   | - |   | - |
| MC2-146 |   | - |   | - |
| MC2-147 |   | - |   | + |
| MC2-150 |   | - |   | - |
| MC2-155 |   | - |   | - |
| MC2-157 |   | - |   | + |
| MC2-170 |  | + |  | + |

---

| Fox Serum ID | CDV                                                                                 |   | CPV                                                                                 |   |
|--------------|-------------------------------------------------------------------------------------|---|-------------------------------------------------------------------------------------|---|
| S10          |    | - |    | - |
| S11          |    | - |    | - |
| S14          |    | + |    | + |
| S15          |    | - |    | - |
| S16          |    | - |    | + |
| A1           |    | + |    | - |
| A3           |   | - |   | - |
| A4           |  | - |  | + |
| A5           |  | - |  | + |
| A7           |  | - |  | - |
| A8           |  | - |  | + |
| A12          |  | - |  | - |
| A13          |  | - |  | - |
| A14          |  | - |  | + |
| A17          |  | - |  | - |
| A19          |  | - |  | + |

| Fox Serum ID | CDV                                                                                   |   | CPV                                                                                   |   |
|--------------|---------------------------------------------------------------------------------------|---|---------------------------------------------------------------------------------------|---|
| A50          |    | - |    | + |
| A52          |    | - |    | + |
| 52B          |    | - |    | - |
| C2           |    | - |    | - |
| C5           |    | - |    | + |
| C6           |    | - |    | + |
| C9           |   | - |   | + |
| C12          |  | - |  | - |
| C13          |  | - |  | + |
| C15          |  | - |  | + |
| C16          |  | - |  | - |
| C30          |  | - |  | - |
| C32          |  | + |  | - |
| C35          |  | - |  | + |
| C36          |  | - |  | - |
| C37          |  | + |  | + |

|          |                                                                                     |   |                                                                                     |   |          |                                                                                       |   |                                                                                       |   |
|----------|-------------------------------------------------------------------------------------|---|-------------------------------------------------------------------------------------|---|----------|---------------------------------------------------------------------------------------|---|---------------------------------------------------------------------------------------|---|
| A20      |    | - |    | - | C38      |    | + |    | - |
| A21      |    | - |    | - | C39      |    | + |    | + |
| A23      |    | + |    | - | C40      |    | - |    | - |
| A24      |    | - |    | - | C43      |    | - |    | - |
| A25      |    | - |    | + | C44      |    | + |    | + |
| A27      |    | - |    | - | C45      |    | + |    | - |
| A30      |    | - |    | + | C46      |    | - |    | + |
| A31      |   | + |   | - | C48      |   | - |   | + |
| A36      |  | - |  | + | C53      |  | - |  | - |
| A37      |  | + |  | - | C56      |  | + |  | - |
| A40      |  | - |  | + | C59      |  | - |  | - |
| A45      |  | + |  | + | C60      |  | - |  | - |
| A46      |  | - |  | + | C63      |  | - |  | + |
| A48      |  | - |  | - | C64      |  | - |  | - |
| GF.CR.6  |  | + |  | + | RF.CR.14 |  | + |  | - |
| RF.CR.11 |  | - |  | + | GF.CR.25 |  | + |  | + |
| RF.CR.12 |  | - |  | + | RF.CR.26 |  | + |  | + |
| RF.CR.13 |  | + |  | + | RF.CR.34 |  | + |  | + |



|          |                                                                                   |   |                                                                                   |   |
|----------|-----------------------------------------------------------------------------------|---|-----------------------------------------------------------------------------------|---|
| RF.CR.35 |  | - |  | + |
| RF.CR.37 |  | + |  | - |
| RF.CR.39 |  | - |  | + |
| RF.CR.41 |  | + |  | - |
| RF.CR.42 |  | + |  | + |
| RF.CR.43 |  | + |  | + |

---

|            |                                                                                     |   |                                                                                     |   |
|------------|-------------------------------------------------------------------------------------|---|-------------------------------------------------------------------------------------|---|
| RF.CR.44   |  | + |  | + |
| RF.11.6.19 |  | - |  | + |
| RF.12.7.19 |  | - |  | + |
| RF.1.5.20  |  | - |  | + |
| RF.1.6.20  |  | + |  | + |
| RF.2.4.20  |  | + |  | + |

---
